# Supplementary figures and images for: A matrix metalloproteinase activation probe for painting human tumours
Source: Royal Society of Chemistry journal article supplement (doi:10.1039/d0cc03886e), 2020-01-01

# Cy5.5 fragment  
 $t_R$  4.62min

FAM fragment \* $t_R$  2.17min

3  
 $t_R$  3.33min  
¥

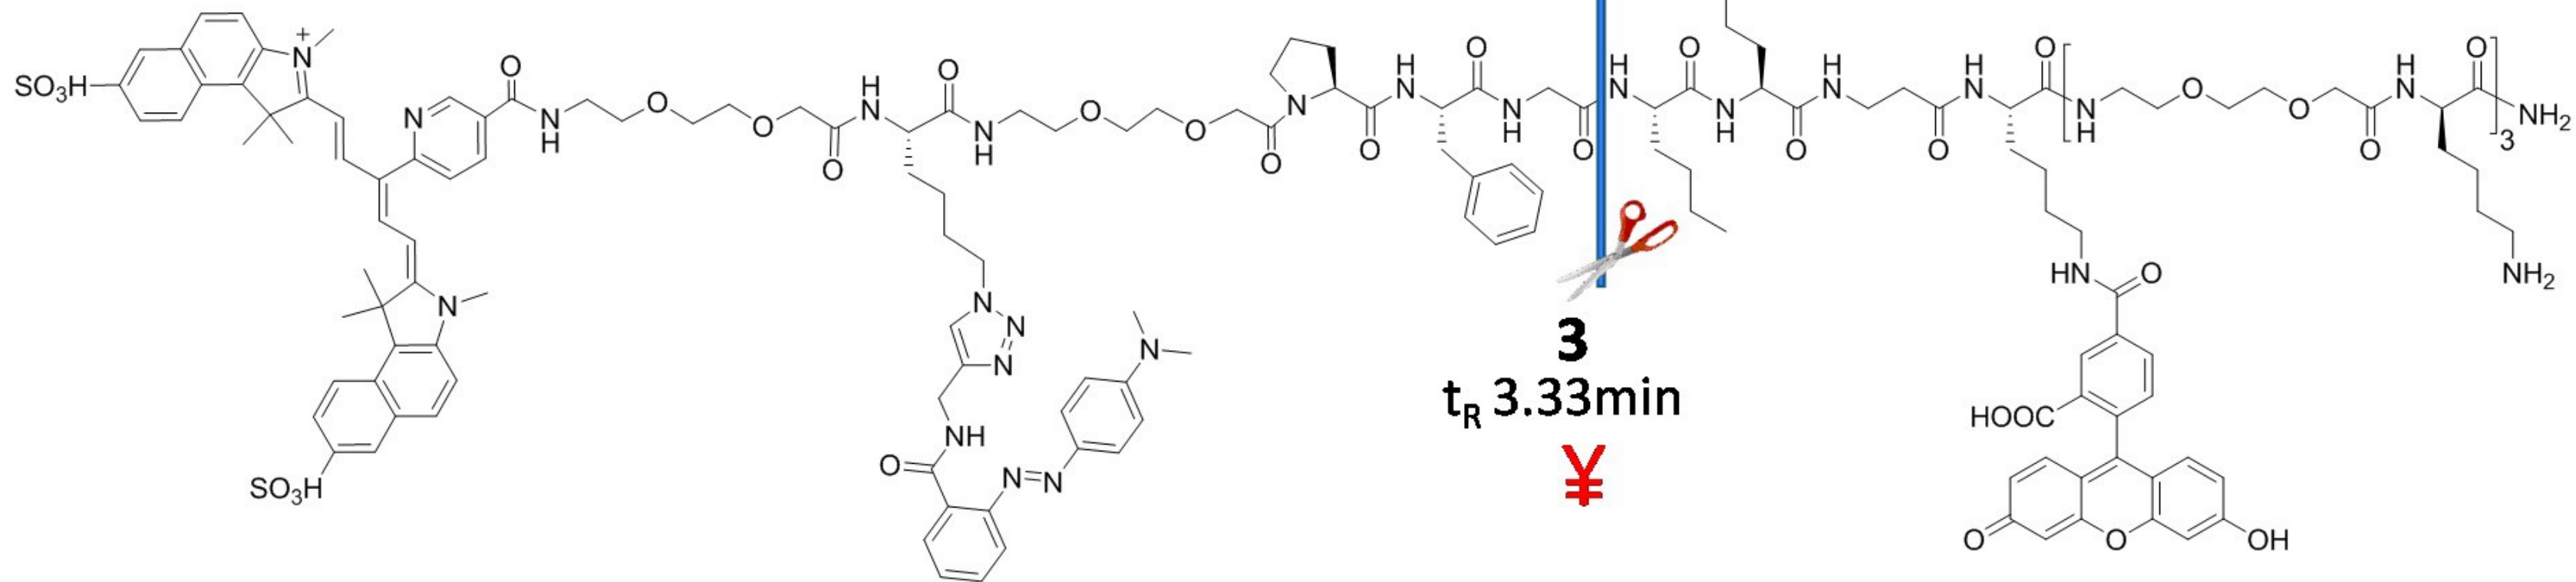

Supplement: d0cc03886e2.pdf [file d0cc03886e2.pdf]
